# Supplementary material for: Effect of NOx on product yields and Arrhenius parameters of gas-phase oxidation of β-ocimene initiated by OH˙ radicals
Source: Royal Society of Chemistry journal article supplement (doi:10.1039/c6ra20321c), 2016-01-01
Supplement: c6ra20321c1.pdf [file c6ra20321c1.pdf]

**Supplementary Information**  
**for**  
**Effect of NO<sub>x</sub> on product yields and Arrhenius**  
**parameters of gas-phase oxidation of β-ocimene**  
**initiated by OH· radicals**

Elizabeth Gaona-Colmán<sup>a</sup>, María B. Blanco<sup>a</sup>, Ian Barnes<sup>b</sup> and Mariano A. Teruel<sup>a\*</sup>

<sup>a</sup> Instituto de Investigaciones en Fisicoquímica de Córdoba (I.N.F.I.Q.C.), Facultad de Ciencias Químicas, Universidad Nacional de Córdoba. Ciudad Universitaria, 5000 Córdoba, Argentina.

<sup>b</sup> Bergische Universität Wuppertal, Fakultät für Mathematik und Naturwissenschaften, Physikalische Chemie & Theoretische Chemie, Gauss Strasse 20, 42119 Wuppertal, Germany.

\*Corresponding author: mteruel@fcq.unc.edu.ar.

**Content Summary**

Infrared spectra for a β-ocimene/H<sub>2</sub>O<sub>2</sub>/air reaction mixture and reaction products (S1), and a β-ocimene/H<sub>2</sub>O<sub>2</sub>/NO<sub>x</sub>/air reaction mixture and reaction products (S2).

Concentration-time profiles plots for a β-ocimene/H<sub>2</sub>O<sub>2</sub>/air reaction mixture and the reaction products (S3), and a β-ocimene/H<sub>2</sub>O<sub>2</sub>/NO<sub>x</sub>/air reaction mixture and the reaction products (S4).

Yield plots for the reaction of OH radicals with β-ocimene/H<sub>2</sub>O<sub>2</sub>/air reaction mixture in the absence of NO<sub>x</sub> (S5) and in the presence of NO<sub>x</sub> (S6)

Simplified mechanisms for the OH-radical initiated oxidation of β-ocimene (S7, S8, and S9)

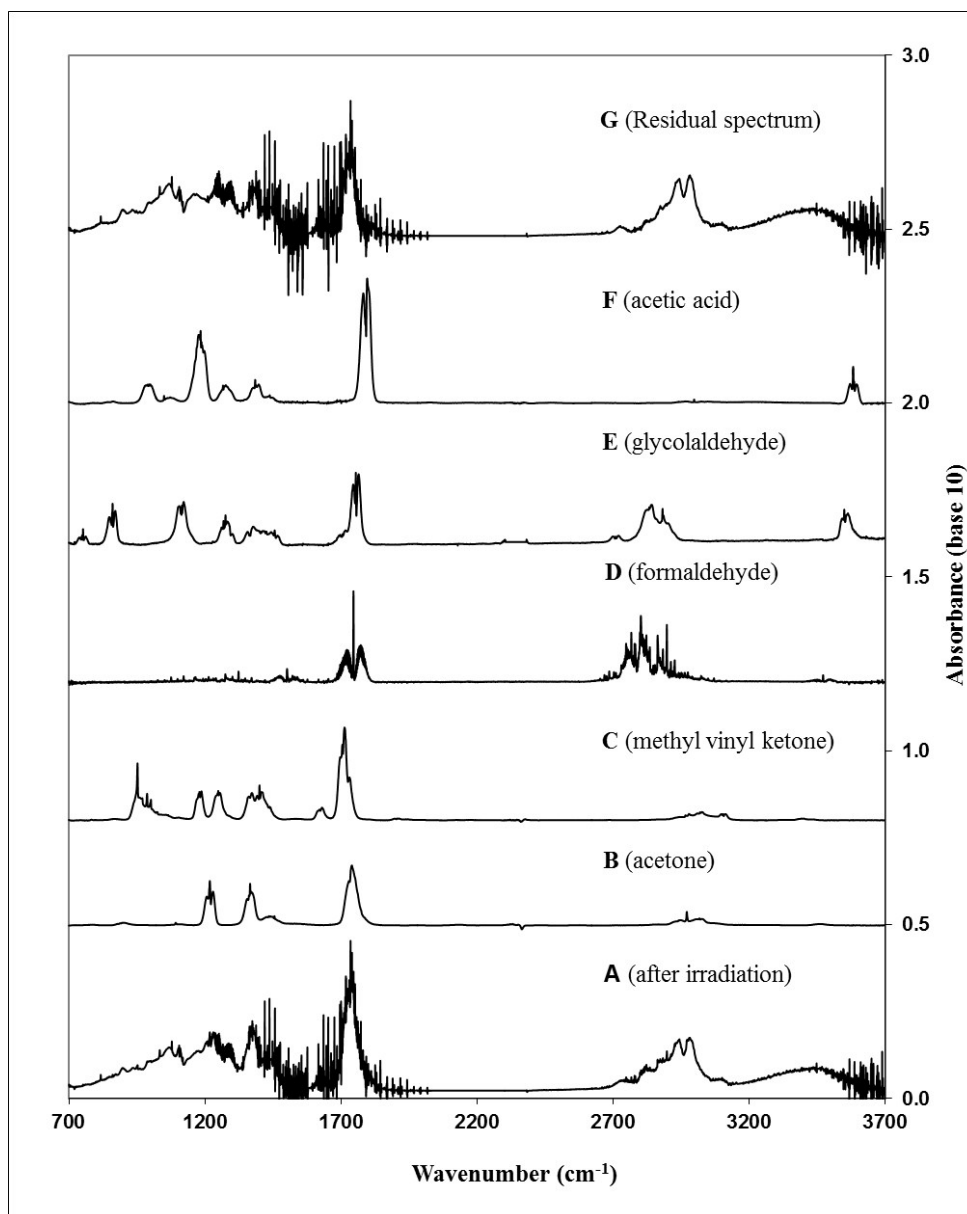

**Figure S1:** Panel A shows the infrared spectrum of a  $\beta$ -ocimene/ $\text{H}_2\text{O}_2$ /air reaction mixture after irradiation and subtraction of residual  $\beta$ -ocimene. Panels B, C, D, E and F show reference spectra of acetone, methyl vinyl ketone, formaldehyde, glycolaldehyde, and acetic acid, respectively. Panel G shows the residual product spectrum obtained after subtraction of features due to the reference spectra from the spectrum in panel A.

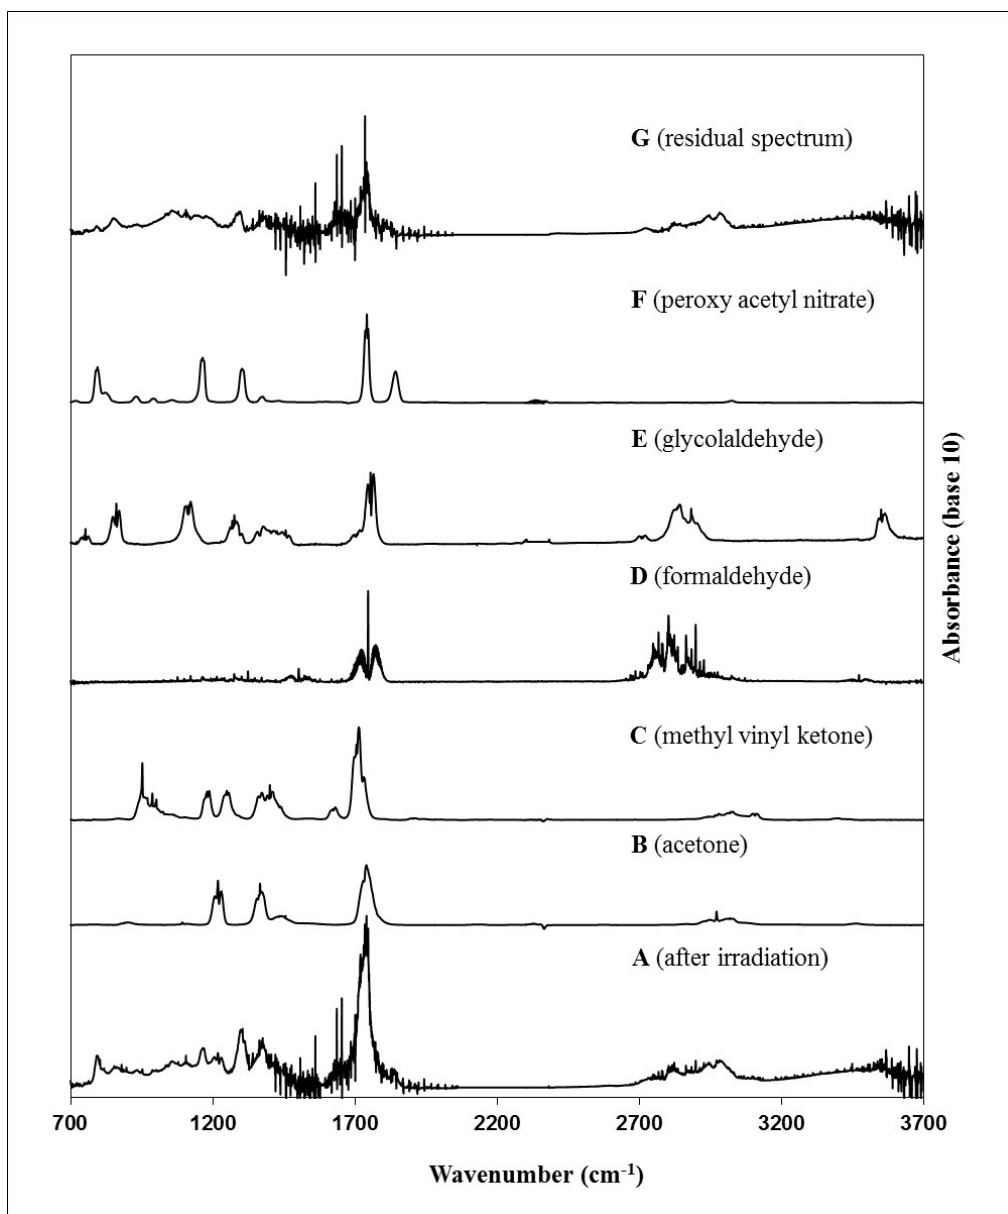

**Figure S2:** Panel A shows the infrared spectrum of a  $\beta$ -ocimene/H<sub>2</sub>O<sub>2</sub>/NO<sub>x</sub>/air reaction mixture after irradiation and subtraction of residual  $\beta$ -ocimene. Panel B, C, D, E and F show reference spectra of acetone, methyl vinyl ketone, formaldehyde, glycolaldehyde, and peroxy acetyl nitrate, respectively. Panel G shows the residual product spectrum obtained after subtraction of features due to the reference spectra from the spectrum in panel A.

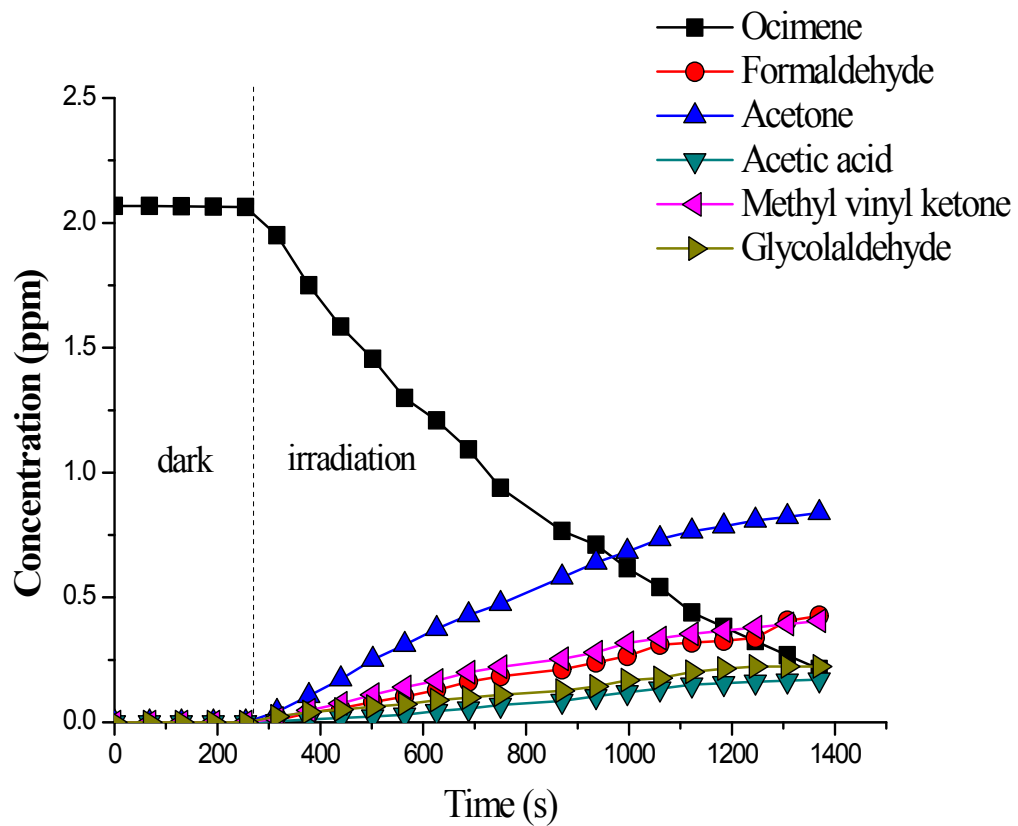

**Figure S3:** Concentration-time profiles of ocimene and the reaction products formaldehyde, acetone, methyl vinyl ketone, glycolaldehyde and acetic acid (in the absence of  $\text{NO}_x$ ) obtained from the irradiation of a  $\beta$ -ocimene/ $\text{H}_2\text{O}_2$ /air reaction mixture.

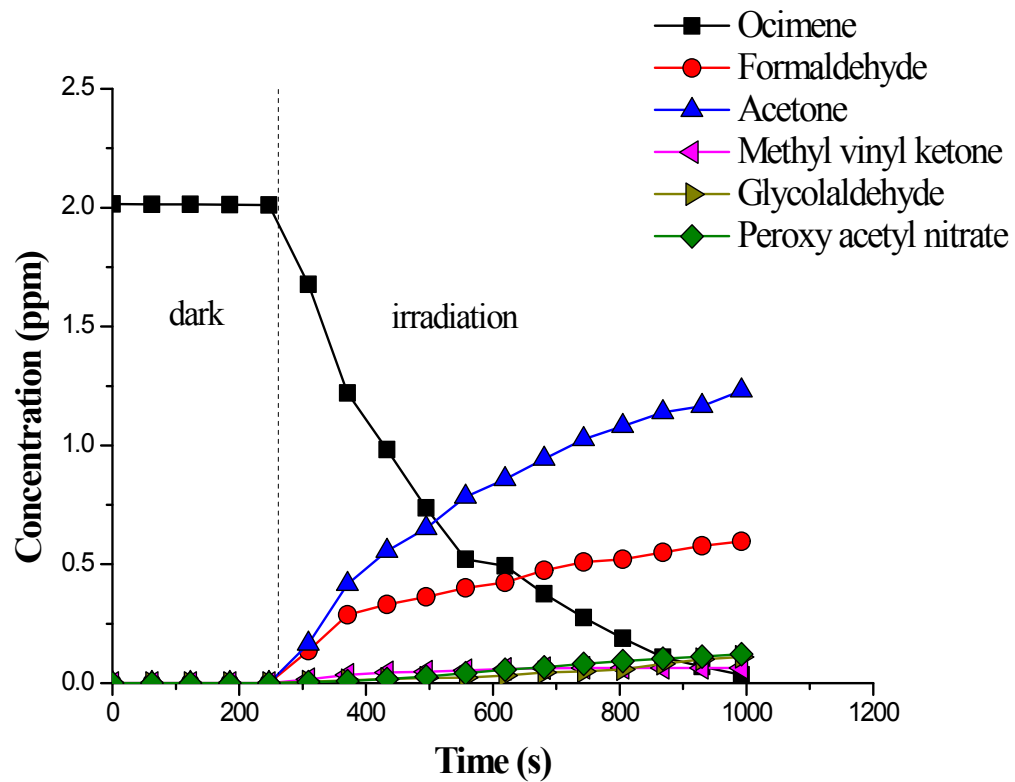

**Figure S4:** Concentration-time profiles of ocimene and the reaction products formaldehyde, acetone, methyl vinyl ketone, glycolaldehyde and peroxy acetyl nitrate (in the presence of  $\text{NO}_x$ ) obtained from the irradiation of a  $\beta$ -ocimene/ $\text{H}_2\text{O}_2$ / $\text{NO}_x$ /air reaction mixture.

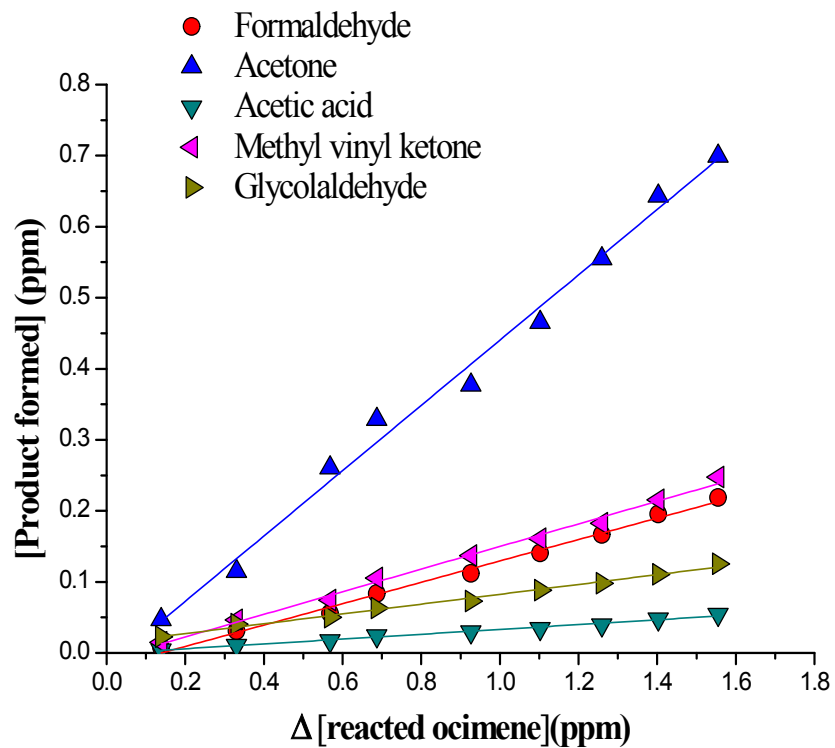

**Figure S5:** Plots of the concentrations of the reaction products formaldehyde ( $\circ$ ), acetone ( $\Delta$ ), acetic acid ( $\nabla$ ), methyl vinyl ketone ( $\triangleleft$ ) and glycolaldehyde ( $\triangleright$ ) as a function of reacted  $\beta$ -ocimene obtained from the irradiation of a  $\beta$ -ocimene/ $\text{H}_2\text{O}_2$ /air reaction mixture in the absence of  $\text{NO}_x$ .

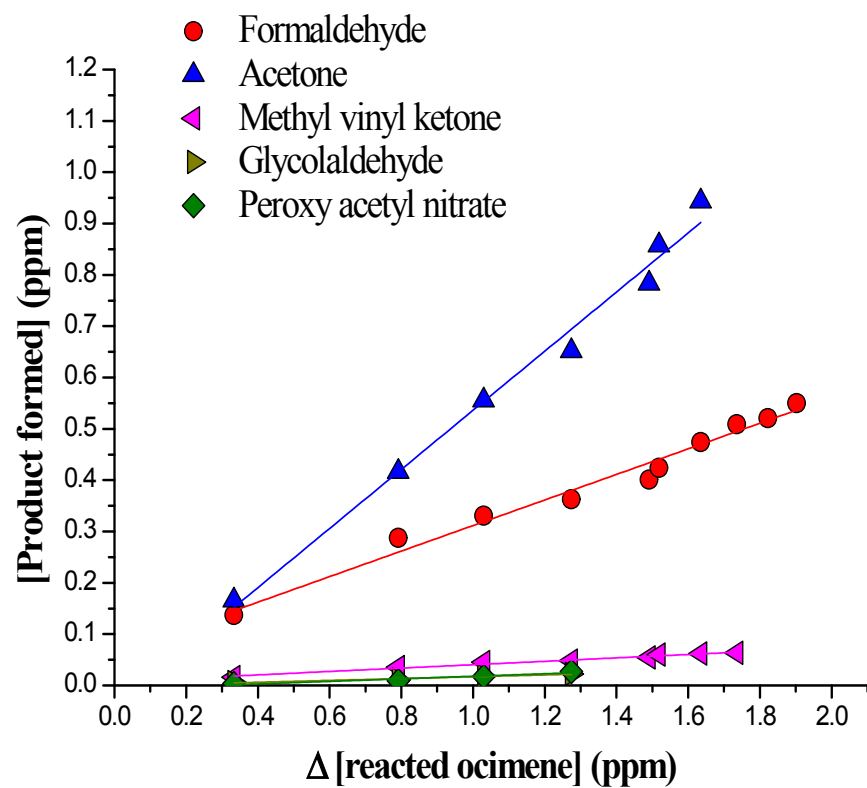

**Figure S6:** Plots of the concentrations of the reaction products formaldehyde ( $\circ$ ), acetone ( $\Delta$ ), methyl vinyl ketone ( $\triangleleft$ ), glycolaldehyde ( $\triangleright$ ) and peroxy acetyl nitrate ( $\diamond$ ) as a function of reacted  $\beta$ -ocimene obtained from the irradiation of a  $\beta$ -ocimene/ $\text{H}_2\text{O}_2$ /air reaction mixture in the presence of  $\text{NO}_x$ .

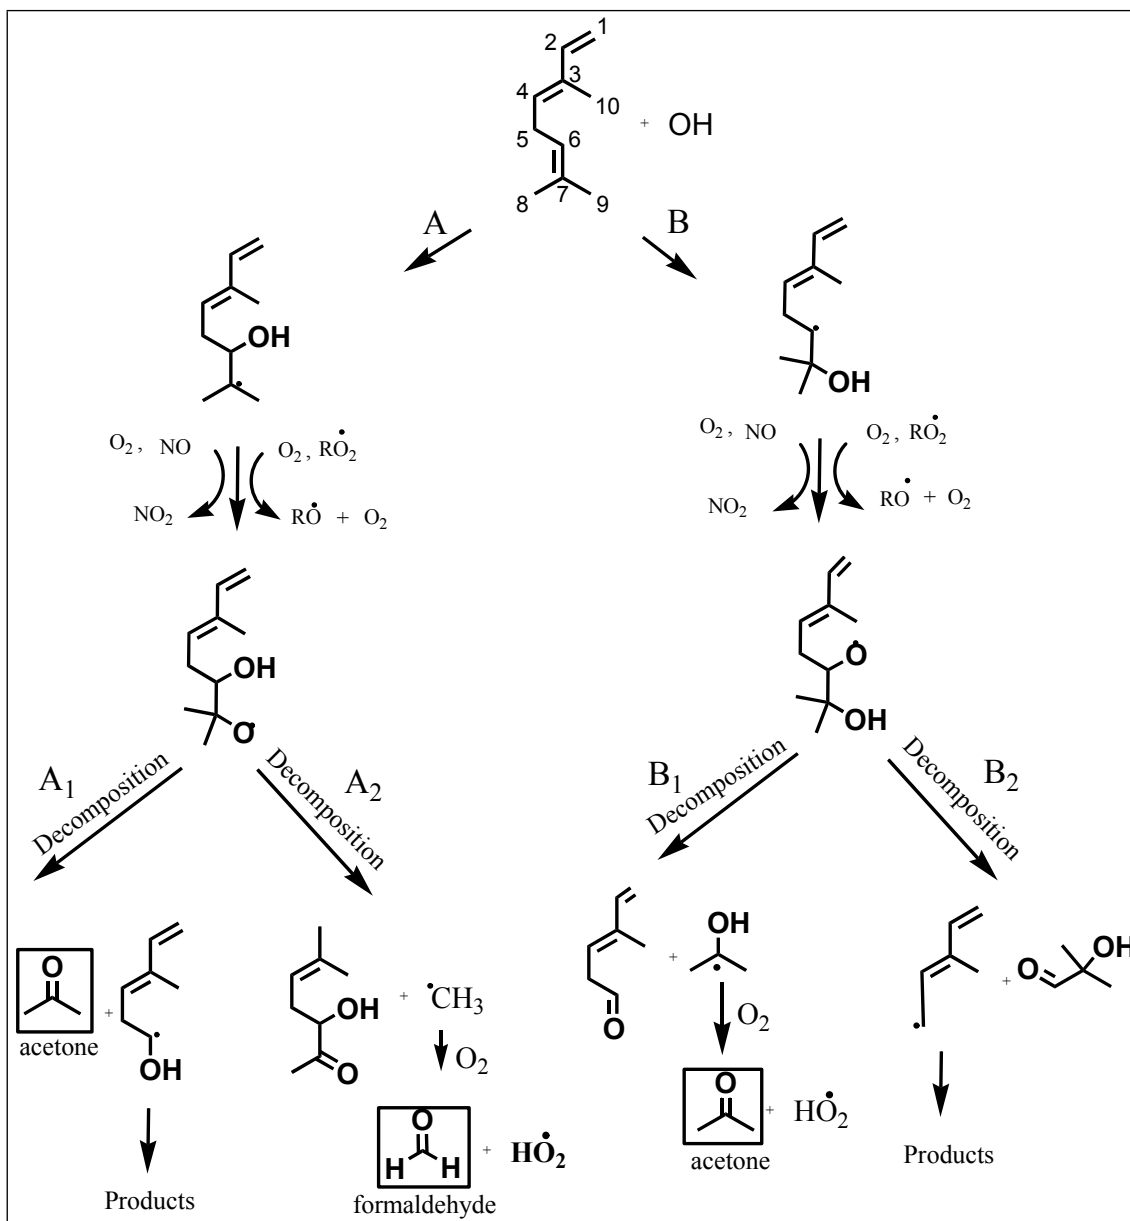

**Figure S7.** Simplified mechanism for the OH-radical initiated oxidation of  $\beta$ -ocimene via addition of OH $\cdot$  to the double bond binding C<sub>6</sub> and C<sub>7</sub>.



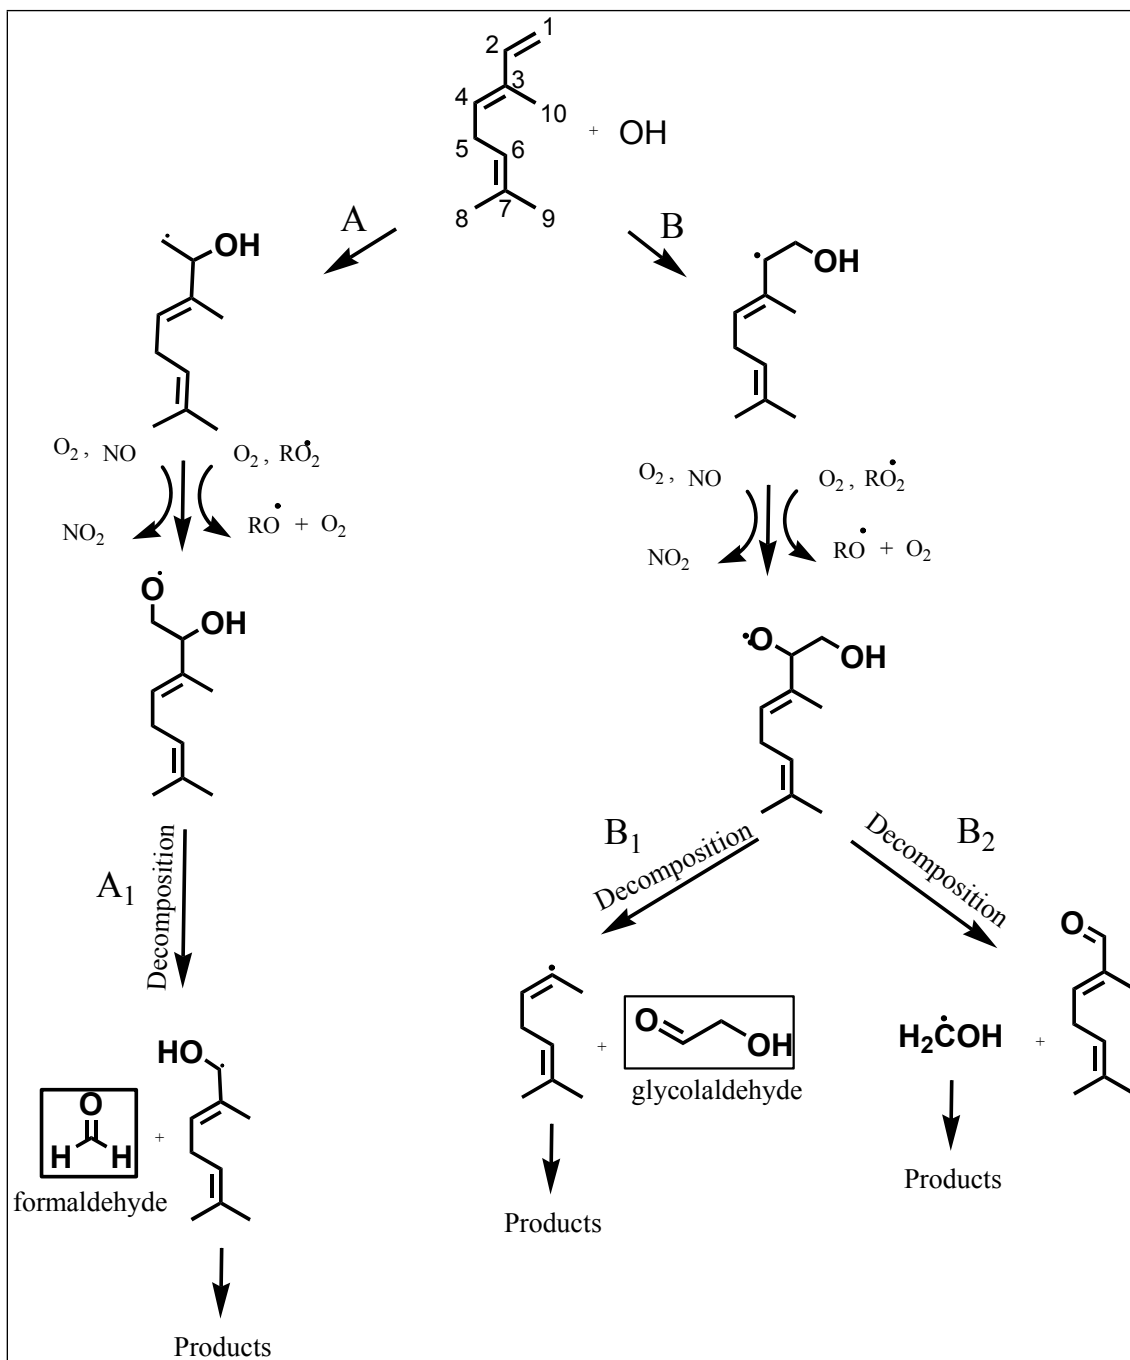

**Figure S8.** Simplified mechanism for the OH·-radical initiated oxidation of β-ocimene via addition of OH· to the double bond binding C<sub>1</sub> and C<sub>2</sub>.

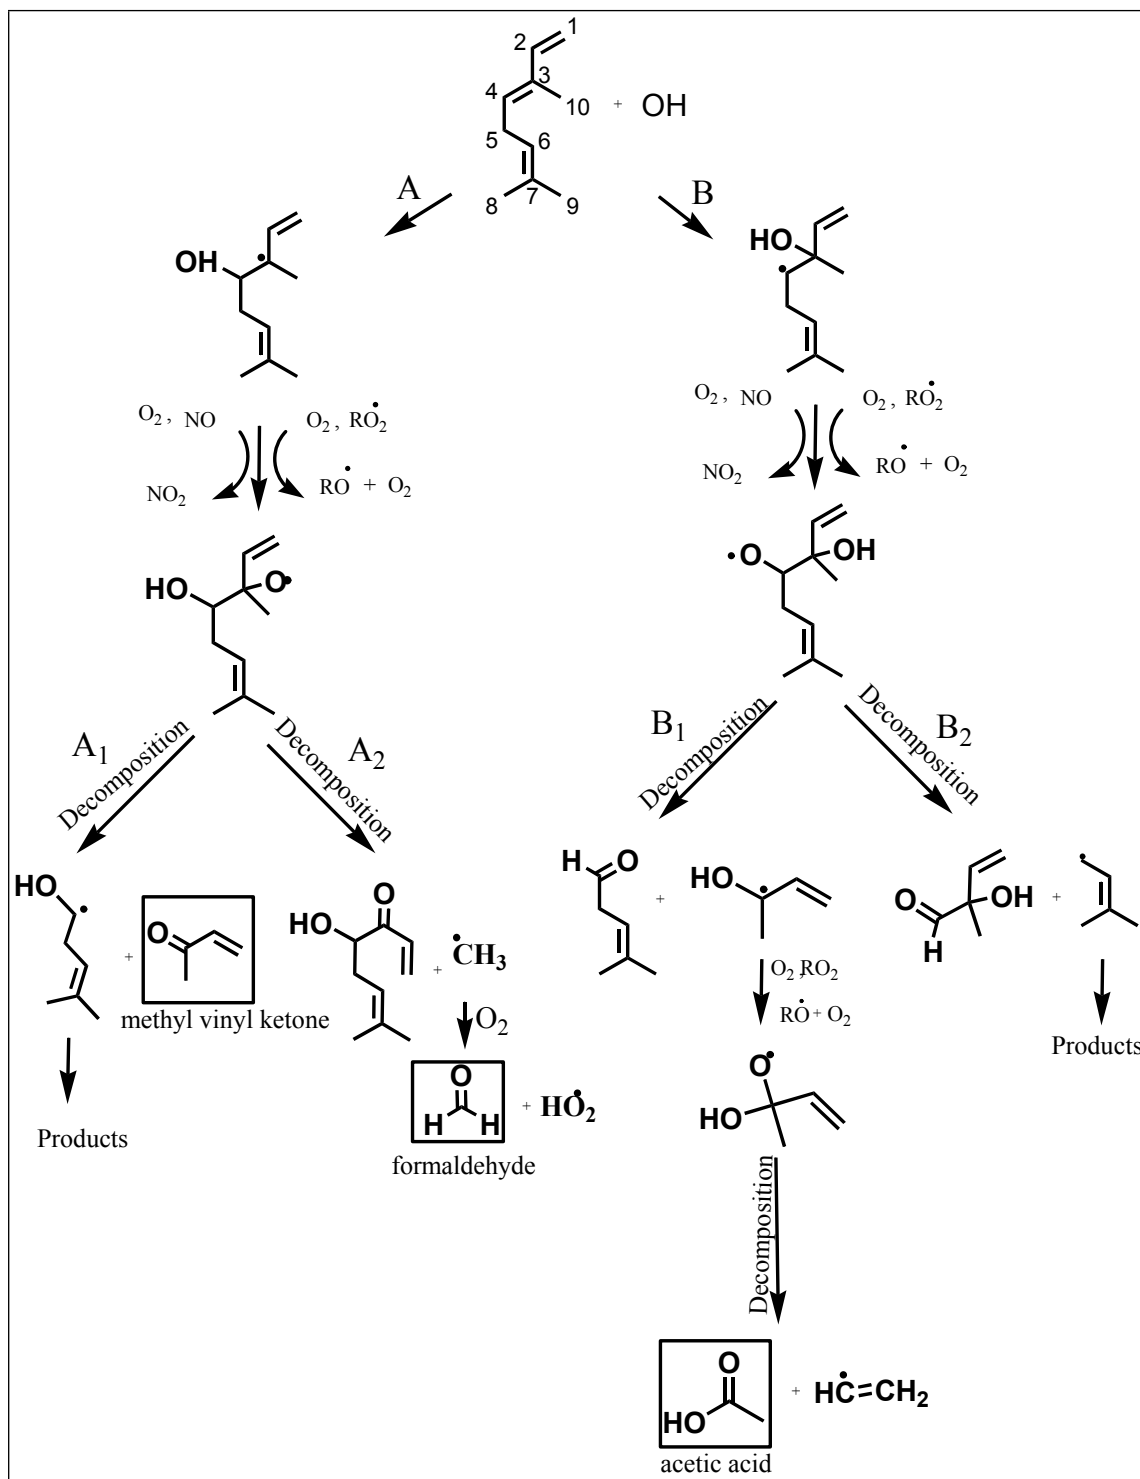

**Figure S9.** Simplified mechanism for the OH·-radical initiated oxidation of  $\beta$ -ocimene via addition of OH· to the double bond binding C<sub>3</sub> and C<sub>4</sub>.
